# Global Transcriptomic Analysis of Human Neuroblastoma Cells in Response to Enterovirus Type 71 Infection

Li-Juan Xu<sup>1,2,3</sup>, Tao Jiang<sup>1,3</sup>, Fu-Jun Zhang<sup>3,3</sup>, Jian-Feng Han<sup>1</sup>, Juan Liu<sup>1</sup>, Hui Zhao<sup>1</sup>, Xiao-Feng Li<sup>1</sup>, Rui-Ju Liu<sup>4</sup>, Yong-Qiang Deng<sup>1</sup>, Xiao-Yan Wu<sup>1</sup>, Shun-Ya Zhu<sup>1</sup>, E-De Qin<sup>1</sup>, Cheng-Feng Qin<sup>1\*</sup>

**1** Department of Virology, State Key Laboratory of Pathogen and Biosecurity, Beijing Institute of Microbiology and Epidemiology, Beijing, China, **2** PLA 404 Hospital, Weihai, China, **3** Rizhao Hospital of Traditional Chinese Medicine, Rizhao, China, **4** Liaocheng People's Hospital, Liaocheng, China

## Abstract

Human enterovirus type 71 (EV71) is the major pathogen of hand-foot-and-mouth disease (HFMD) and has been associated with severe neurological disease and even death in infants and young children. The pathogenesis of EV71 infection in the human central nervous system remains unclear. In this study, human whole genome microarray was employed to perform transcriptome profiling in SH-SY5Y human neuroblastoma cells infected with EV71. The results indicated that EV71 infection lead to altered expression of 161 human mRNAs, including 74 up-regulated genes and 87 down-regulated genes. Bioinformatics analysis indicated the possible roles of the differentially regulated mRNAs in selected pathways, including cell cycle/proliferation, apoptosis, and cytokine/chemokine responses. Finally, the microarray results were validated using real-time RT-PCR with high identity. Overall, our results provided fundamental information regarding the host response to EV71 infection in human neuroblastoma cells, and this finding will help explain the pathogenesis of EV71 infection and virus-host interaction.

**Citation:** Xu L-J, Jiang T, Zhang F-J, Han J-F, Liu J, et al. (2013) Global Transcriptomic Analysis of Human Neuroblastoma Cells in Response to Enterovirus Type 71 Infection. PLoS ONE 8(7): e65948. doi:10.1371/journal.pone.0065948

**Editor:** Xiao-Fang Yu, Johns Hopkins School of Public Health, United States of America

**Received:** January 27, 2013; **Accepted:** April 30, 2013; **Published:** July 5, 2013

**Copyright:** © 2013 Xu et al. This is an open-access article distributed under the terms of the Creative Commons Attribution License, which permits unrestricted use, distribution, and reproduction in any medium, provided the original author and source are credited.

**Funding:** This work was supported by the Beijing Natural Science Foundation (7122129, 7112108) and the National Natural Science Foundation of China (No.31270195). CFQ was supported by Beijing Nova Program of Science and Technology (No.2010B041). The funders had no role in study design, data collection and analysis, decision to publish, or preparation of the manuscript.

**Competing Interests:** The authors have declared that no competing interests exist.

\* E-mail: qincf@bmi.ac.cn

These authors contributed equally to this work.

## Introduction

Human enterovirus 71 (EV71) is a single-stranded, positive-sense RNA virus that belongs to the genus *Enterovirus*, family *Picornaviridae* [1]. EV71 has been well recognized as the major pathogen that causes hand-foot-and-mouth disease (HFMD) in infants and young children. Since 1997, large HFMD epidemics with severe neurological complications were associated with EV71 infection, and fatalities were frequently reported in the Asian-Pacific region [2,3]. In China, a large-scale HFMD outbreak gave rise to 2,203,597 reported cases that caused 559 deaths in 2012 (<http://www.moh.gov.cn/mohjbyfkzj/s6873/list.shtml>). Currently, there is neither an approved vaccine nor any effective antiviral drugs for EV71 infection.

Until now, the pathogenesis of EV71 infection has remained unclear. The clinical significance and major cause of death of EV71 were due to severe neurological complications, including extensive neuronal degeneration, central nervous system (CNS) inflammation and pulmonary congestion with hemorrhage. Recently, EV71 infection with CNS involvement and cardiopulmonary failure were associated with neurologic sequelae, delayed neurodevelopment, and reduced cognitive functioning [2]. Mouse experiments revealed that EV71 invaded the CNS through retrograde axonal transport and that hematogenous transport represented only a minor route of transmission [4,5,6]. Histopathological changes, such as neuronal degeneration, neuronal

loss and neuronophagia, were observed in the spinal cord, brainstem, and skeletal muscle, along with necrotizing myositis and splenic atrophy, after gerbils were inoculated intraperitoneally with EV71 [7]. Additionally, radiological or histopathological evidence of the induction of paralysis, a similar process to that of poliovirus, was also observed during EV71 infection [8,9,10,11]. Post-mortem studies revealed EV71-associated neurogenic pulmonary edema [12,13,14,15], which was in agreement with the experimental infection of cynomolgus macaques with EV71 [16,17,18,19].

The host response to viral infection represents complex and divergent pathways that interact with the invading viruses. Systemic analysis of the host response to EV71 infection in human neural cells will provide critical clues to understand the molecular mechanisms of EV71-associated neurological complications. In terms of adaptability and computational resources, microarray technology makes it possible to assess the expression profiles for many non-model species. Microarrays have been used to analyze global gene expression at both the cell culture and organismal levels for many viruses, including dengue virus, Epstein-Barr virus, human immunodeficiency virus, avian influenza A (H5N1), and human hepatitis C virus, etc. [20,21,22,23,24]. Recently, Leong et al. analyzed host gene expression in EV71-infected RD cells, EV71-permissive human muscle cells, using microarray analysis [25]. Human glioblastoma SF268 cells were also used to study global changes in mRNA

**Table 1.** Primers used for Real-time RT-PCR analysis.

| Gene            | Primer sequence (5' → 3') |                      |
|-----------------|---------------------------|----------------------|
|                 | Sense                     | Antisense            |
| <b>SMC1A</b>    | GCTACAAGACCTGAAGAATC      | CGAATCTCTCCATCTCAT   |
| <b>SMARCC1</b>  | GCTACAAGACCTGAAGAATC      | ACTTCTGACTGGCTCTTC   |
| <b>SGK</b>      | CAAGACACAAGGCAGAAGA       | CATTCCGCTCCGACATAA   |
| <b>CYFIP1</b>   | GTCTGTACTCTGATGGATGG      | CCTGGAGTTGCTTGAAGT   |
| <b>KIAA1212</b> | TGCTACAGAACAGAACAC        | GTAATCCAGTTGCCTCTC   |
| <b>AMOTL2</b>   | AGAACAACCTGCGAGAGAA       | AAATACTTCTGCTCCACTT  |
| <b>PRKAA2</b>   | ATAGACAGAAGATTCCGAGTT     | CCTCCAGACACATATCCAT  |
| <b>NDEL1</b>    | GCTGATAACCAAAGACTGAA      | AACACTGAGACCTGCTTA   |
| <b>PCYT2</b>    | CTCACCACAGACCTCATC        | TCCTTGGCTTCTTCTTC    |
| <b>TCN1</b>     | TCAGGTAACCTCAACATCTC      | TTAGCACAGTGACATTGG   |
| <b>SF3B3</b>    | CTTGTCTGCTCCTTATTAG       | CTTGTCTGCTCGTATGTG   |
| <b>BCAN</b>     | GGAAGGTAAGGCATTGGA        | CCTCTCTCTTCTTCTTC    |
| <b>GAPDH*</b>   | AGAAGGCTGGGGCTCATTTG      | AGGGGCCATCCACAGTCTTC |

\*Housekeeping gene transcript serving as the normalization control for real-time RT-PCR.

Other genes were selected from the microarray analysis for real-time RT-PCR. doi:10.1371/journal.pone.0065948.t001

expression during EV71 infection, and the results indicated that genes associated with chemokines, interferon, complement activation and apoptosis were up-regulated [26].

In this study, gene expression profiling data from human neuroblastoma SH-SY5Y cells infected with EV71 was obtained using microarray analysis and validated using real-time RT-PCR. Bioinformatics analysis revealed that the differentially regulated mRNAs were associated with cell cycle/proliferation, apoptosis and cytokine/chemokine responses in the host.

## Materials and Methods

### Cells and Viruses

Human neuroblastoma cells SH-SY5Y (ATCC, CRL-2266<sup>TM</sup>) was cultured in Dulbecco's modified Eagle's medium/F-12 (DMEM/F-12, Invitrogen), supplemented with 10% fetal bovine serum (FBS) (Gibco), 50 U/ml penicillin and 0.1 mg/ml streptomycin at 37°C in 5% CO<sub>2</sub>. Human rhabdomyosarcoma (RD, ATCC, CCL-136<sup>TM</sup>) cells were grown in DMEM supplemented with 10% FBS. The EV71 strain AH08/06, classified as EV71 subtype C4, was isolated from a throat swab sample of an HFMD case during an outbreak in 2008 in Anhui, China [27]. The viral stocks were prepared in RD cells, and virus titers were determined using a plaque-forming assay as previously described [28].

### Viral Growth Kinetics in SH-SY5Y Cells

SH-SY5Y cells were infected with EV71 at a multiplicity of infection (m.o.i.) of 1 and incubated at 37°C for 2 h. The infected cells were washed twice with phosphate-buffered saline (PBS) and refed with fresh medium. Viral cultures were harvested at 6, 12, 24, 48 and 72 h post-infection (h.p.i.), and the virus titer was determined using a standard plaque-forming assay on RD cells as previously described [28]. The plaque assays were carried out in triplicate.

An indirect immunofluorescence assay (IFA) was performed as previously described [29]. Briefly, SH-SY5Y cells were infected with EV71 strain AH08/06 and fixed at 24 h.p.i. The cells were

incubated with EV71 monoclonal antibody EVF12 and then treated with a 200-fold dilution of fluorescein isothiocyanate (FITC)-labeled anti-globulin (Chemicon) in 0.02% (w/v) Evans blue. After multiple washes, the positive cells were detected using a fluorescent microscope (OLYMPUS, Tokyo, Japan).

### Microarray Analysis

SH-SY5Y cells ( $2 \times 10^5$  cell/ml) were seeded onto 6-well plates and then incubation infected with EV71 at 1 m.o.i. overnight. After incubation, the cells were washed with PBS and refed with a 2% containing medium. Cells were treated with TRIzol (Invitrogen) and frozen for microarray analysis of their genetic expression profile. Total RNAs were extracted using the NucleoSpin<sup>®</sup> RNA clean-up kit (MACHEREY-NAGEL, Germany) at 12 h.p.i.

To analyze the host gene expression, the 35K Human Genome Array (Operon) comprising oligonucleotide probes that average at 70 bases in length for 35035 genes from the human genome oligo database (human\_V4.0) was used. Total RNA was reverse transcribed using the Cbc Script II reverse transcriptase and T7 oligo (dT) primer, substituting a fraction of the dTTP in the newly synthesized strands with aminoallyl-dUTP (AA-dUTP). Dye-labeled cDNA was created using Cy3 dye and Cy5 dye (GE Healthcare Cat. No. PA55021/PA53021) according to the manufacturer's protocols. Hybridization to the microarray was performed according to the manufacturer's protocol of SmartArray<sup>TM</sup> (CapitalBio Corp., Beijing, China). All of the data were submitted to the GEO microarray database according to the LuxScan 3.0 standards (CapitalBio). All of the files were transformed and normalized using Loess normalization techniques. A two-way analysis of variance (ANOVA) was performed (infection and control) ( $p < 0.05$ ). The degree of fold-change (relative fluorescent intensity) was analyzed for all of the differentially regulated genes using the SAM software [30]. A list of significant genes was generated and a hierarchical clustering was performed. The microarray analysis dataset was submitted to Gene Expression Omnibus under the accession number GSE45589.

### Ontology (GO) Terms and KEGG Pathway Annotation

For the statistical analyses, the genes that were significantly up- or down-regulated ( $p < 0.05$ ) with ratios  $> 2$  or  $< 0.5$  were selected and included in the database for modeling into ontological networks (CapitalBio<sup>®</sup> Molecule Annotation System, V3.0). Network modeling was then performed to determine the interactions between the significant genes, canonical pathways analysis to determine the genes involved in known pathways and disease/physiological function/location annotation using Fisher's exact test. This process was performed on all of the significant genes and on the gene ontology enriched datasets.

### Confirmation of Microarray Data for Selected Genes by Real-time RT-PCR

A total of twelve genes of interest ( $p < 0.05$ , fold change  $> 2$  or  $< 0.5$ ) were selected for further validation using SYBR green-based real-time RT-PCR.

Real-time RT-PCR primers were designed and synthesized using Beacon Designer software (Table 1); GAPDH was set to be the endogenous control. Briefly, each 20  $\mu$ l reaction included 2  $\mu$ l of total RNA, 0.4  $\mu$ M of each primer, 1.2  $\mu$ l TaKaRa Ex Taq HS Mix, 0.4  $\mu$ l PrimeScript PLUS RTase Mix, and 10  $\mu$ l of 2 $\times$ One step SYBR RT-PCR Buffer 4 (Roche). The reactions were subjected to reverse-transcription of 42°C 5 min and 95°C for 10 s, followed by 40 cycles each of 95°C for 5 s, 60°C for 20 s, and

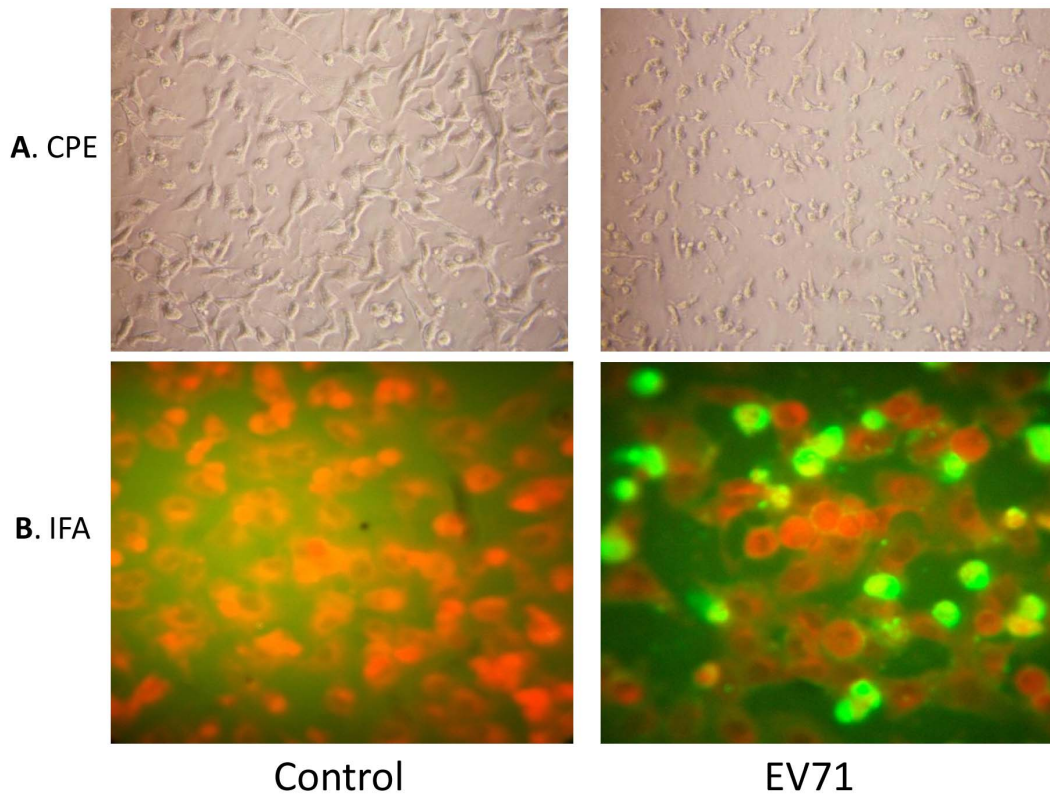

**Figure 1. Human SH-SY5Y cells are permissive to EV71 infection.** A. Typical CPE caused by EV71. Cells infected with EV71 were observed and photographed using an inverted microscope (Olympus, 40 $\times$ ) at 48 hours post-infection. The uninfected cells were shown in parallel as control (mock). B. Viral protein expression in SH-SY5Y cells infected with EV71. The viral protein was detectable after the cells infected with EV71 24 h by IFA assay (OLYMPUS, Tokyo, Japan). doi:10.1371/journal.pone.0065948.g001

subjected to melting curve analysis. Each gene was quantified relative to the calibrator. Calculations were made using the instruments and equation  $2^{-\Delta\Delta CT}$ . Each assay was performed in triplicate.

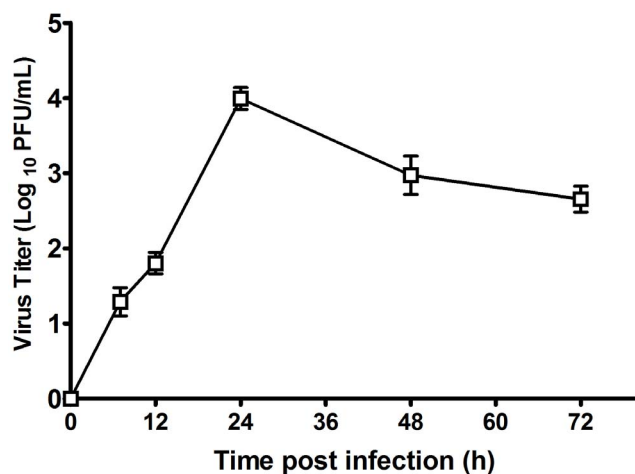

**Figure 2. One-step growth curves of EV71 strain AH/08/06 in SH-SY5Y cell lines.** SH-SY5Y cells were inoculated with the EV71 virus, and supernatant cultures were collected at 6, 12, 24, 48, and 72 hours post-infection and virus titers were determined using a plaque assay. doi:10.1371/journal.pone.0065948.g002

## Results

### Human Neuroblastoma Cells are Permissive to EV71 Infection

In this study, to ensure that human neuroblastoma cells could be used for microarray analysis, SH-SY5Y cells were infected with EV71 at an m.o.i. of 1. As shown in Figure 1A, EV71 infection in SH-SY5Y cells caused significant cytopathic effects (CPE), including rounding up, aggregation, and death, at 48 h.p.i. The viral protein was also detectable in both the nucleus and cytoplasm of the SH-SY5Y cells by IFA assay (Figure 1B). One-step viral growth curve assay indicated that EV71 replicated efficiently in SH-SY5Y cells and peaked at approximately  $10^4$  PFU/ml at 24 h.p.i. (Figure 2). This result showed that human neuroblastoma SH-SY5Y cells are permissive to EV71 infection in vitro.

### Global Transcriptomic Analysis of EV71-infected SH-SY5Y Cells

To perform whole human genomic array analysis, SH-SY5Y cells infected with EV71 were subjected to 35K Human Genome Array. The differentially transcribed genes in SH-SY5Y in response to EV71 infection were shown in clustering analysis (Figure 3). Microarray hybridization preliminarily identified 161 genes as being differentially expressed during EV71 infection, including 74 up-regulated genes (Table S1) and 87 down-regulated genes (Table S2). Some of these genes have been identified in association with neurological disorders and may therefore have roles in the nervous system lesion-induced EV71 infection, such as *SGK*, *CYFIP1*, *NDEL1*, *KIAA1212*, *BCAN*, *SF3B3*, *SMC1A*, and

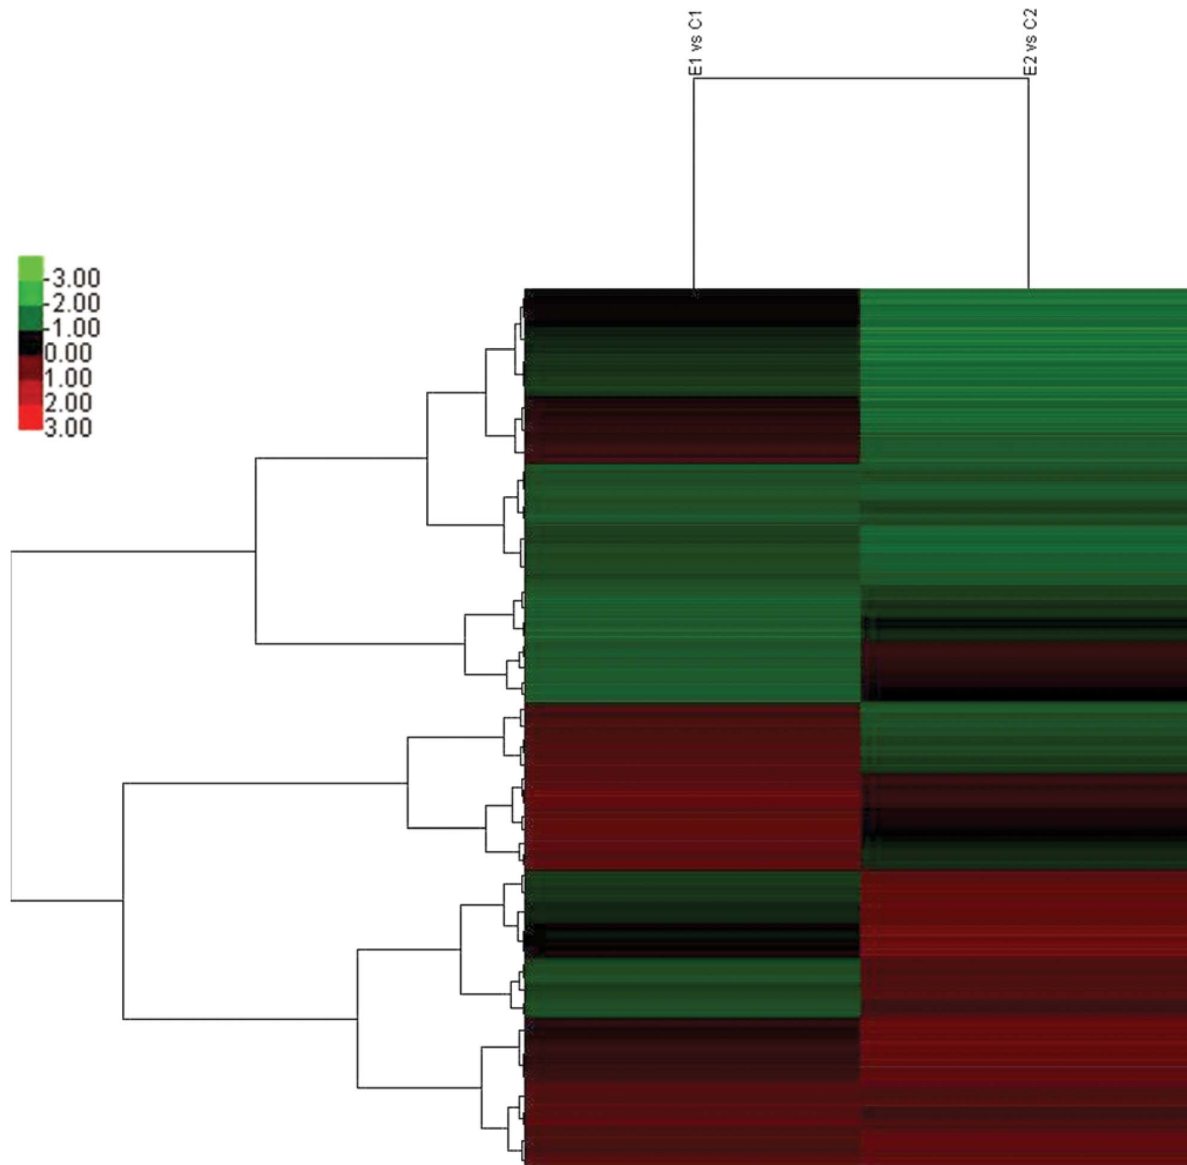

**Figure 3. Heat map of the microarray gene expression profile of SH-SY5Y cells infected with EV71.** The two-way hierarchical cluster heat map showed selected significantly expressed mRNAs in two independent samples. Each row shows the relative expression level for a single mRNA, and each column shows the expression level of a single sample. The mRNAs were chosen according to the cutoff  $p < 0.01$  in direct comparison. Red represents mRNAs with increased expression, and green represents mRNAs with decreased expression.

doi:10.1371/journal.pone.0065948.g003

*TCN1*. Other genes, such as *AMOTL2*, *PCYT2*, and *SMARCC1*, were reported to relate to immune and inflammatory responses.

To facilitate the analysis of our data, the on-line CapitalBio® Molecule Annotation System V3.0 was used to identify the gene ontology functional classes and pathways that were enriched among the differentially expressed genes in EV71-infected SH-SY5Y cells compared with the non-infected cells. Firstly, significantly up-regulated (ratio  $> 2$ ) or down-regulated (ratio  $< 0.5$ ) ( $p < 0.05$ ) genes were selected and included in the database for modeling into ontological networks for GO analysis. The results showed that each section represented a different type of biological process found in EV71-infected SH-SY5Y cells, including transcription, cell proliferation, metabolism, immune responses (Figure 4). Then, the significantly expressed genes ( $P < 0.001$ ) were assigned in the KEGG pathway, as shown in

Table 2. The significant P-values determine the probability of the association between the genes in the dataset and the KEGG pathway. Regulation pathways, such as the Notch signaling pathway, cell cycle, p53 signaling pathway, which play critical roles in cell proliferation, apoptosis and growth, respectively, were identified during EV71 infection in SH-SY5Y cells (Table 2).

#### Validation Using Real-time RT-PCR

To confirm the microarray results, the relative abundances of the selected mRNAs were assayed using a real-time RT-PCR assay. Twelve cellular genes (Table 1) associated with neurologic sequelae were selected for further validation. The fold changes of mRNAs in the EV71-infected SH-SY5Y cells were calculated using instruments and equation  $2^{-\Delta\Delta CT}$  (Figure 5). Real-time RT-PCR revealed that the mRNA expression level of *SMC1A* was up-



**Table 2.** Analysis pathway of different globe genes by KEGG.

| Pathway name                                 | Count* | p-Value   |
|----------------------------------------------|--------|-----------|
| Retinol metabolism                           | 12     | 3.37E-18  |
| Drug metabolism - other enzymes              | 11     | 1.36E-17  |
| Pentose and glucuronateinterconversions      | 9      | 6.63E-17  |
| Ascorbate and aldarate metabolism            | 9      | 1.01E-16  |
| Porphyrin and chlorophyll metabolism         | 9      | 1.09E-14  |
| Androgen and estrogen metabolism             | 9      | 2.72E-14  |
| Metabolism of xenobiotics by cytochrome P450 | 10     | 3.51E-14  |
| Drug metabolism - cytochrome P450            | 10     | 4.71E-14  |
| Starch and sucrose metabolism                | 9      | 1.11E-13  |
| Cytokine-cytokine receptor interaction       | 8      | 2.69E-06  |
| Hematopoietic cell lineage                   | 4      | 1.99E-04  |
| Notch signaling pathway                      | 3      | 5.02E-04  |
| Cell cycle                                   | 4      | 6.55E-04  |
| Methionine metabolism                        | 2      | 0.002576  |
| Nitrogen metabolism                          | 2      | 0.0028042 |
| Calcium signaling pathway                    | 4      | 0.0032365 |
| Aminoacyl-tRNA biosynthesis                  | 2      | 0.0080336 |
| Fatty acid metabolism                        | 2      | 0.0096166 |
| Cell adhesion molecules (CAMs)               | 3      | 0.0098716 |
| Jak-STAT signaling pathway                   | 3      | 0.0145845 |
| p53 signaling pathway                        | 2      | 0.0216548 |
| PPAR signaling pathway                       | 2      | 0.0222445 |
| Chronic myeloid leukemia                     | 2      | 0.0252913 |
| Ribosome                                     | 2      | 0.0443484 |
| Toll-like receptor signaling pathway         | 2      | 0.0443484 |
| T cell receptor signaling pathway            | 2      | 0.0499375 |

\*The number of genes in each pathway.  
doi:10.1371/journal.pone.0065948.t002

regulated 11-fold at 12 h.p.i. In addition, the mRNA expression level of *TCNI* was down-regulated 10-fold at 12 h.p.i. according to qRT-PCR. The fold-change calculated by qRT-PCR for *SMCIA* and *TCNI* was greater than that suggested by the microarray data. This finding is in accordance with comparative analysis, which observed that fold change results determined by qRT-PCR were greater than those determined by microarray analysis [31,32]. However, the obtained expression patterns from microarray data and qRT-PCR showed the same directions of response in both methodologies, as shown in Figure 5, indicating the high quality and reliability of the microarray data analysis.

## Discussion

In this study, to better understand the molecular mechanism of EV71 infection in human neuroblastoma cells, the responses of SH-SY5Y cells to EV71 infection were analyzed using microarray and validated using real-time RT-PCR. According to the global mRNA profile analysis, 161 differentially regulated genes, including 74 up-regulated genes and 87 down-regulated genes, were classified according to their functional roles during EV71 infection. Bioinformatics analysis indicated that the differentially regulated mRNAs were associated with host cellular pathways involved in cell cycle/mitosis/proliferation/apoptosis, cytokine/chemokine and immune responses. Previously, mRNA profiling in

EV71-infected RD cells indicated that transcription and translation regulators were suppressed and that apoptosis genes were up-regulated [25]. Microarray analysis for EV71-infected SF268 cells revealed that the up-regulated genes were associated with chemokines, interferon, complement activation, and apoptosis, and the down-regulated genes were involved in transcription and translation regulators [26]. Global transcriptomic analysis in various cells will help to better understand the host responses to EV71 infection.

SH-SY5Y cells are the third successive subclone of SK-N-SH (human neuroblastoma) cells [33,34,35] and have been used to study the pathogenesis of poliovirus [36,37]. Recently, SH-SY5Y cells have been used to study the EV71 site-specific adaptations in the increased neural cell tropism during EV71 infection [38]. In this study, SH-SH5Y human neuroblastoma cells were found to be permissive to EV71 strain AH/08/06 infection in vitro (Fig. 1A). The AH/08/06 strain is classified as subgenotype C4, which has been the sole viral genetic lineage circulating in the mainland since 2007. The strain used in this study exhibits similar recombination events as many other EV71 isolates in mainland China [39,40,41].

According to the microarray data and real-time RT-PCR results, the differences among mRNA expression levels of genes related to the cytoskeleton and motility were significant. The *NDEL1* gene was 2-fold up-regulated in EV71-infected SH-SH5Y cells. *NDEL1* is a substrate for the serine/threonine protein kinase CDK5, which is essential for cortical neuronal migration. *NDEL1* is also linked to the etiology of various mental illnesses and neurodegenerative disorders. For example, *DISC1*, another *NDEL1*-interacting partner, plays essential roles in neuronal proliferation, neuronal migration and axon guidance and has been implicated in schizophrenia and related psychiatric disorders [42,43,44,45]. The potential roles of neurological diseases during EV71 infection deserve further investigation. Additionally, *SF3B3*, which is a component of the minor U12-type spliceosome, was 2.8-fold up-regulated in response to EV71 infection. Kotake et al. suggested that a splicing impairment of pladienolide may cause the organism to repress the expression of certain genes essential for cell proliferation or cell survival [46]. In our study, up-regulation of the *SF3B3* gene may be related to SH-SY5Y cell proliferation or cell survival during EV71 infection.

Transcription, pre-mRNA processing (capping, splicing and polyadenylation), mRNA surveillance and mRNA export compose the process of gene expression. These steps are extensively coupled to form gene expression factories. In our results, *CYFIP1* (also known as Sra-1), which is a clathrin heavy-chain binding protein associated with mental retardation and specifically expressed in the nervous system, was up-regulated in the SH-SY5Y cells by EV71 infection. The levels of the protein encoded by fragile X mental retardation protein (FMRP), which inhibits translation initiation, and target mRNAs are increased upon the reduction of *CYFIP1* in neurons. Moreover, brain cytoplasmic RNA 1 (BC1) increases the affinity of FMRP for the *CYFIP1*-eIF4E complex. Sukarieh et al. found that the nuclear re-localization of eIF4E corresponds with the repression of host protein synthesis in response to poliovirus infection [47]. It has been demonstrated that picornavirus infection could repress eIF4E expression [48].

EV71 has been demonstrated to induce apoptosis in several cell lines [49,50,51]. Apoptosis-associated proteins were regulated to various degrees, notably to support the apoptosis-evasive effects of EV71. In neuronal disease, serum- and glucocorticoid-regulated kinase (SGK) regulates glutamate receptors and up-regulates glutamate transporters. SGK1 participates in diverse biological processes and in the signaling of brain-derived neurotrophic factor (BDNF) and transforming growth factor- $\beta$  (TGF- $\beta$ ), both of which

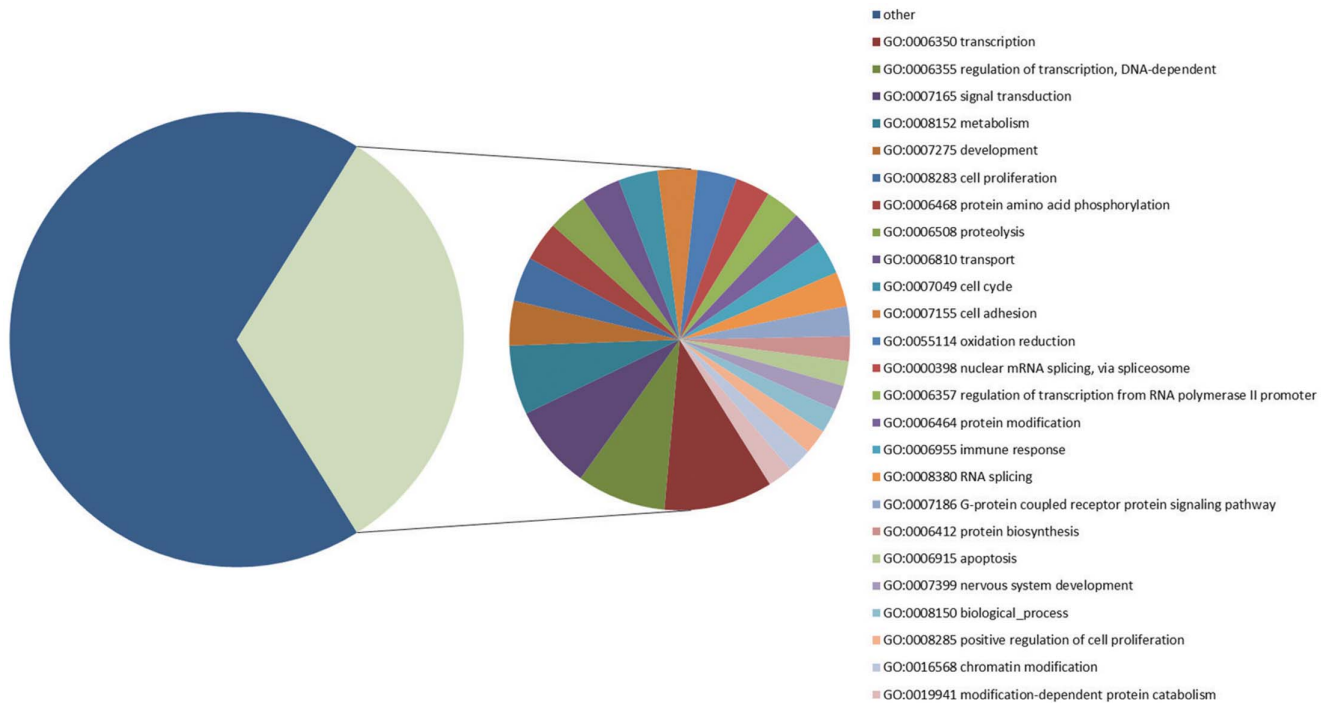

**Figure 4. Enriched GO terms in the biological process category among the differentially expressed genes.** Enriched GO analysis of the microarray data was performed using the web-based analysis software CapitalBio® Molecule Annotation System V3.0. The results indicated the biological processes performed by the differentially expressed genes ( $p < 0.01$ ) in the EV71-infected SH-SY5Y cells. Each section represents a different type of biological process. The number of genes enriched is shown after the name of the process.  
doi:10.1371/journal.pone.0065948.g004

are neuroprotective after seizures. Schoenebeck et al. found that *SGK1* was up-regulated in various neurotoxic animal models of Parkinson’s disease [52], which may be linked to the CNS complications of EV71 infection. Another apoptosis-associated gene, *FEM1B*, was down-regulated during EV71 infection. Several studies have shown that *FEM1B* induces apoptosis when expression is increased in cancer cells, including breast cancer, cervical cancer, neuroblastoma, and fibrosarcoma cells [52,53,54].

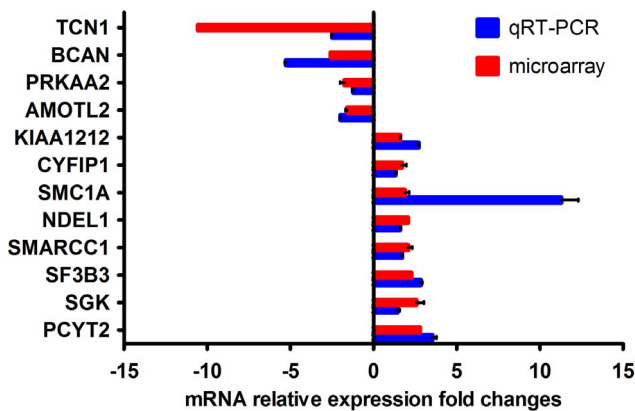

**Figure 5. Valuation differential expression selected genes by real-time RT-PCR.** Twelve expression levels of selected genes from the microarray assay were validated by real-time RT-PCR at 12 h.p.i EV71 infection. The relative fold change was calculated based on an endogenous control normalization and repeated three times independently.  
doi:10.1371/journal.pone.0065948.g005

The genes encoded a number of cell-signaling proteins involved in immune responses and cell proliferation, such as *SMARCC1*, which was up-regulated during EV71 infection. The protein encoded by *SMARCC1* is a member of the SWI/SNF family, which controls cellular processes, such as growth, development, cell cycle, differentiation, apoptosis, retroviral infection, and carcinogenesis. Jeong et al. indicated that mice that constitutively expressed the SWI/SNF complex in T cells were much more susceptible to experimentally induced autoimmune encephalomyelitis than were normal mice [55]. Additionally, angiominin-like protein 2 (*AMOTL2*) and two other members of the motin family are the Yes-associated protein 1 (*YAP1*)-associated proteins, which regulate the expression of several proliferation- and apoptosis-related genes. It has been reported that *AMOTL2* is essential for cell movements in vertebrate embryos [56] and serves as a scaffolding protein to regulate Wnt/ $\beta$ -catenin [7]. In addition, the phosphate cytidyltransferase 2 (*PCYT2*) gene was 3.5-fold up-regulated during EV71 infection in SH-SY5Y cells. The formation of CDP-ethanolamine is catalyzed by *PCYT2* in the Kennedy pathway of phospholipid synthesis and is involved in cell signaling, cell division, and apoptosis. Furthermore, their study suggested that both *EGR1* and *NF- $\kappa$ B* could be potential regulators of *PCYT2* gene transcription [57].

Overall, bioinformatics analysis of EV71 infection showed that differentially regulated mRNAs were associated with the host cellular pathways directing cell cycle/proliferation, apoptosis and cytokine/chemokine and immune responses. This finding requires further laboratory and clinical analysis, including assays to confirm the changes in protein levels. The expression of up/down-regulated genes, such as *PCYT2*, *SGK*, *SMC1A*, *SMARCC1*, *BCAN* and *TCN1*, in EV71-infected SH-SY5Y cells also warrants further study to verify whether they act directly or indirectly to initiate the

neurologic sequelae. Regardless of the answer, this study provided important information on the host response to EV71 infection, which lays the foundation to understand the pathophysiological mechanisms of EV71 infection in human neural cells and the CNS.

## Supporting Information

**Table S1 Up-regulated genes in EV71-infected SH-SY5Y cells.**  
(DOC)

## References

- McMinn PC (2002) An overview of the evolution of enterovirus 71 and its clinical and public health significance. *FEMS Microbiol Rev* 26: 91–107.
- Chang LY, Huang LM, Gau SS, Wu YY, Hsia SH, et al. (2007) Neurodevelopment and cognition in children after enterovirus 71 infection. *N Engl J Med* 356: 1226–1234.
- Wang YF, Chou CT, Lei HY, Liu CC, Wang SM, et al. (2004) A mouse-adapted enterovirus 71 strain causes neurological disease in mice after oral infection. *J Virol* 78: 7916–7924.
- Chen CS, Yao YC, Lin SC, Lee YP, Wang YF, et al. (2007) Retrograde axonal transport: a major transmission route of enterovirus 71 in mice. *J Virol* 81: 8996–9003.
- Ong KC, Badmanathan M, Devi S, Leong KL, Cardoso MJ, et al. (2008) Pathologic characterization of a murine model of human enterovirus 71 encephalomyelitis. *J Neuropathol Exp Neurol* 67: 532–542.
- Khong WX, Yan B, Yeo H, Tan EL, Lee JJ, et al. (2012) A non-mouse-adapted enterovirus 71 (EV71) strain exhibits neurotropism, causing neurological manifestations in a novel mouse model of EV71 infection. *J Virol* 86: 2121–2131.
- Yao PP, Qian L, Xia Y, Xu F, Yang ZN, et al. (2012) Enterovirus 71-Induced Neurological Disorders in Young Gerbils, *Meriones unguiculatus*: Development and Application of a Neurological Disease Model. *PLoS One* 7: e51996.
- Hayward JC, Gillespie SM, Kaplan KM, Packer R, Pallansch M, et al. (1989) Outbreak of poliomyelitis-like paralysis associated with enterovirus 71. *Pediatr Infect Dis J* 8: 611–616.
- Chumakov M, Voroshilova M, Shindarov L, Lavrova I, Gracheva L, et al. (1979) Enterovirus 71 isolated from cases of epidemic poliomyelitis-like disease in Bulgaria. *Arch Virol* 60: 329–340.
- Wang SM, Liu CC, Tseng HW, Wang JR, Huang CC, et al. (1999) Clinical spectrum of enterovirus 71 infection in children in southern Taiwan, with an emphasis on neurological complications. *Clin Infect Dis* 29: 184–190.
- Shen WC, Tsai C, Chiu H, Chow K (2000) MRI of Enterovirus 71 myelitis with monoplegia. *Neuroradiology* 42: 124–127.
- McMinn P, Stratov I, Nagarajan L, Davis S (2001) Neurological manifestations of enterovirus 71 infection in children during an outbreak of hand, foot, and mouth disease in Western Australia. *Clin Infect Dis* 32: 236–242.
- Chen CY, Chang YC, Huang CC, Lui CC, Lee KW, et al. (2001) Acute flaccid paralysis in infants and young children with enterovirus 71 infection: MR imaging findings and clinical correlates. *AJNR Am J Neuroradiol* 22: 200–205.
- Hsueh C, Jung SM, Shih SR, Kuo TT, Shieh WJ, et al. (2000) Acute encephalomyelitis during an outbreak of enterovirus type 71 infection in Taiwan: report of an autopsy case with pathologic, immunofluorescence, and molecular studies. *Mod Pathol* 13: 1200–1205.
- Ng DK, Law AK, Cherk SW, Mak KL (2001) First fatal case of enterovirus 71 infection in Hong Kong. *Hong Kong Med J* 7: 193–196.
- Hashimoto I, Hagiwara A, Kodama H (1978) Neurovirulence in cynomolgus monkeys of enterovirus 71 isolated from a patient with hand, foot and mouth disease. *Arch Virol* 56: 257–261.
- Hagiwara A, Yoneyama T, Takami S, Hashimoto I (1984) Genetic and phenotypic characteristics of enterovirus 71 isolates from patients with encephalitis and with hand, foot and mouth disease. *Arch Virol* 79: 273–283.
- Nagata N, Shimizu H, Ami Y, Tano Y, Harashima A, et al. (2002) Pyramidal and extrapyramidal involvement in experimental infection of cynomolgus monkeys with enterovirus 71. *J Med Virol* 67: 207–216.
- Nagata N, Iwasaki T, Ami Y, Tano Y, Harashima A, et al. (2004) Differential localization of neurons susceptible to enterovirus 71 and poliovirus type 1 in the central nervous system of cynomolgus monkeys after intravenous inoculation. *J Gen Virol* 85: 2981–2989.
- Fink J, Gu F, Ling L, Tolfvenstam T, Olfat F, et al. (2007) Host gene expression profiling of dengue virus infection in cell lines and patients. *PLoS Negl Trop Dis* 1: e86.
- Dai Y, Tang Y, He F, Zhang Y, Cheng A, et al. (2012) Screening and functional analysis of differentially expressed genes in EBV-transformed lymphoblasts. *Virol J* 9: 77.
- Gupta A, Nagilla P, Le HS, Bunney C, Zych C, et al. (2011) Comparative expression profile of miRNA and mRNA in primary peripheral blood mononuclear cells infected with human immunodeficiency virus (HIV-1). *PLoS One* 6: e22730.
- Chakrabarti AK, Vipat VC, Mukherjee S, Singh R, Pawar SD, et al. (2010) Host gene expression profiling in influenza A virus-infected lung epithelial (A549) cells: a comparative analysis between highly pathogenic and modified H5N1 viruses. *Virol J* 7: 219.
- Khalid SS, Hamid S, Siddiqui AA, Qureshi A, Qureshi N (2011) Gene profiling of early and advanced liver disease in chronic hepatitis C patients. *Hepato Int* 5: 782–788.
- Leong WF, Chow VT (2006) Transcriptomic and proteomic analyses of rhabdomyosarcoma cells reveal differential cellular gene expression in response to enterovirus 71 infection. *Cell Microbiol* 8: 565–580.
- Shih SR, Stollar V, Lin JY, Chang SC, Chen GW, et al. (2004) Identification of genes involved in the host response to enterovirus 71 infection. *J Neurovirol* 10: 293–304.
- Cao RY, Han JF, Jiang T, Tian X, Yu M, et al. (2011) In vitro and in vivo characterization of a new enterovirus type 71-specific human intravenous immunoglobulin manufactured from selected plasma donors. *J Clin Virol* 51: 246–249.
- Han JF, Cao RY, Deng YQ, Tian X, Jiang T, et al. (2011) Antibody dependent enhancement infection of enterovirus 71 in vitro and in vivo. *Virol J* 8: 106.
- Deng YQ, Dai JX, Ji GH, Jiang T, Wang HJ, et al. (2011) A broadly flavivirus cross-neutralizing monoclonal antibody that recognizes a novel epitope within the fusion loop of E protein. *PLoS One* 6: e16059.
- Tusher VG, Tibshirani R, Chu G (2001) Significance analysis of microarrays applied to the ionizing radiation response. *Proc Natl Acad Sci U S A* 98: 5116–5121.
- Yuen T, Wurmbach E, Pfeiffer RL, Ebersole BJ, Sealton SC (2002) Accuracy and calibration of commercial oligonucleotide and custom cDNA microarrays. *Nucleic Acids Res* 30: e48.
- Dallas PB, Gottardo NG, Firth MJ, Beesley AH, Hoffmann K, et al. (2005) Gene expression levels assessed by oligonucleotide microarray analysis and quantitative real-time RT-PCR – how well do they correlate? *BMC Genomics* 6: 59.
- Ross RA, Spengler BA, Biedler JL (1983) Coordinate morphological and biochemical interconversion of human neuroblastoma cells. *J Natl Cancer Inst* 71: 741–747.
- Huang SC, Chang CL, Wang PS, Tsai Y, Liu HS (2009) Enterovirus 71-induced autophagy detected in vitro and in vivo promotes viral replication. *J Med Virol* 81: 1241–1252.
- Tung WH, Hsieh HL, Yang CM (2010) Enterovirus 71 induces COX-2 expression via MAPKs, NF-kappaB, and AP-1 in SK-N-SH cells: Role of PGE(2) in viral replication. *Cell Signal* 22: 234–246.
- La Monica N, Racaniello VR (1989) Differences in replication of attenuated and neurovirulent polioviruses in human neuroblastoma cell line SH-SY5Y. *J Virol* 63: 2357–2360.
- Agol VI, Drozdov SG, Ivannikova TA, Kolesnikova MS, Korolev MB, et al. (1989) Restricted growth of attenuated poliovirus strains in cultured cells of a human neuroblastoma. *J Virol* 63: 4034–4038.
- Cordey S, Petty TJ, Schibler M, Martinez Y, Gerlach D, et al. (2012) Identification of site-specific adaptations conferring increased neural cell tropism during human enterovirus 71 infection. *PLoS Pathog* 8: e1002826.
- Wang X, Zhu C, Bao W, Zhao K, Niu J, et al. (2012) Characterization of full-length enterovirus 71 strains from severe and mild disease patients in northeastern China. *PLoS One* 7: e32405.
- Zhang Y, Tan X, Cui A, Mao N, Xu S, et al. (2013) Complete genome analysis of the c4 subgenotype strains of enterovirus 71: predominant recombination c4 viruses persistently circulating in China for 14 years. *PLoS One* 8: e56341.
- Zhang Y, Zhu Z, Yang W, Ren J, Tan X, et al. (2010) An emerging recombinant human enterovirus 71 responsible for the 2008 outbreak of hand foot and mouth disease in Fuyang city of China. *Virol J* 7: 94.
- Porteous DJ, Thomson P, Brandon NJ, Millar JK (2006) The genetics and biology of DISC1—an emerging role in psychosis and cognition. *Biol Psychiatry* 60: 123–131.
- Brandon NJ (2007) Dissecting DISC1 function through protein-protein interactions. *Biochem Soc Trans* 35: 1283–1286.
- Camargo LM, Wang Q, Brandon NJ (2008) What can we learn from the disrupted in schizophrenia 1 interactome: lessons for target identification and disease biology? *Novartis Found Symp* 289: 208–216; discussion 216–221, 238–240.

**Table S2 Down-regulated genes in EV71-infected SH-SY5Y cells.**  
(DOC)

## Author Contributions

Conceived and designed the experiments: CFQ LJX TJ. Performed the experiments: LJX TJ JFH RJL YQD. Analyzed the data: LJX TJ EDQ CFQ. Contributed reagents/materials/analysis tools: RJL JL HZ XFL FJZ YQD XYW SYZ. Wrote the paper: LJX CFQ.

45. Wang Q, Jaaro-Peled H, Sawa A, Brandon NJ (2008) How has DISC1 enabled drug discovery? *Mol Cell Neurosci* 37: 187–195.
46. Kotake Y, Sagane K, Owa T, Mimori-Kiyosue Y, Shimizu H, et al. (2007) Splicing factor SF3b as a target of the antitumor natural product pladienolide. *Nat Chem Biol* 3: 570–575.
47. Sukarieh R, Sonenberg N, Pelletier J (2010) Nuclear assortment of eIF4E coincides with shut-off of host protein synthesis upon poliovirus infection. *J Gen Virol* 91: 1224–1228.
48. Ho BC, Yu SL, Chen JJ, Chang SY, Yan BS, et al. (2011) Enterovirus-induced miR-141 contributes to shutoff of host protein translation by targeting the translation initiation factor eIF4E. *Cell Host Microbe* 9: 58–69.
49. Kuo RL, Kung SH, Hsu YY, Liu WT (2002) Infection with enterovirus 71 or expression of its 2A protease induces apoptotic cell death. *J Gen Virol* 83: 1367–1376.
50. Li ML, Hsu TA, Chen TC, Chang SC, Lee JC, et al. (2002) The 3C protease activity of enterovirus 71 induces human neural cell apoptosis. *Virology* 293: 386–395.
51. Shih SR, Weng KF, Stollar V, Li ML (2008) Viral protein synthesis is required for Enterovirus 71 to induce apoptosis in human glioblastoma cells. *J Neurovirol* 14: 53–61.
52. Schoenebeck B, Bader V, Zhu XR, Schmitz B, Lubbert H, et al. (2005) Sgk1, a cell survival response in neurodegenerative diseases. *Mol Cell Neurosci* 30: 249–264.
53. Chan SL, Tan KO, Zhang L, Yee KS, Ronca F, et al. (1999) F1Aalpha, a death receptor-binding protein homologous to the *Caenorhabditis elegans* sex-determining protein, FEM-1, is a caspase substrate that mediates apoptosis. *J Biol Chem* 274: 32461–32468.
54. Chan SL, Yee KS, Tan KM, Yu VC (2000) The *Caenorhabditis elegans* sex determination protein FEM-1 is a CED-3 substrate that associates with CED-4 and mediates apoptosis in mammalian cells. *J Biol Chem* 275: 17925–17928.
55. Jeong SM, Lee C, Lee SK, Kim J, Seong RH (2010) The SWI/SNF chromatin-remodeling complex modulates peripheral T cell activation and proliferation by controlling AP-1 expression. *J Biol Chem* 285: 2340–2350.
56. Huang H, Lu FI, Jia S, Meng S, Cao Y, et al. (2007) Amot2 is essential for cell movements in zebrafish embryo and regulates c-Src translocation. *Development* 134: 979–988.
57. Zhu L, Johnson C, Bakovic M (2008) Stimulation of the human CTP:phosphoethanolamine cytidylyltransferase gene by early growth response protein 1. *J Lipid Res* 49: 2197–2211.
